# Supplementary material for: Arabidopsis RBV is a conserved WD40 repeat protein that promotes microRNA biogenesis and ARGONAUTE1 loading
Source: Nat Commun. 2022 Mar 8;13:1217. doi: 10.1038/s41467-022-28872-x (PMC8904849; doi:10.1038/s41467-022-28872-x)
Supplement: Supplementary file 5 — Supplementary Data 3 [file 41467_2022_28872_MOESM5_ESM.xlsx]

## Sheet: Supplementary Data 3
Supplementary Data 3. Small RNA reads in rbv-1 and Col input samples.
ID		Raw counts						Normailized counts (RPM)
Name	Length	Col-1-input	Col-2-input	Col-3-input	rbv-1-1-input	rbv-1-2-input	rbv-1-3-input	Col-1-input	Col-2-input	Col-3-input	rbv-1-1-input	rbv-1-2-input	rbv-1-3-input	ava_Col_input	ava_rbv-1_input	Log2(rbv-1/Col)
ath-miR156a-5p	20	4726	6774	4396	4116	4751	3695	300.73	327.97	318.13	249.9	260.02	250.19	315.61	253.37	-0.316897
ath-miR156b-5p	20	4726	6774	4396	4116	4751	3695	300.73	327.97	318.13	249.9	260.02	250.19	315.61	253.37	-0.316897
ath-miR156c-5p	20	4726	6774	4396	4116	4751	3695	300.73	327.97	318.13	249.9	260.02	250.19	315.61	253.37	-0.316897
ath-miR156d-5p	20	4726	6774	4396	4116	4751	3695	300.73	327.97	318.13	249.9	260.02	250.19	315.61	253.37	-0.316897
ath-miR156e	20	4726	6774	4396	4116	4751	3695	300.73	327.97	318.13	249.9	260.02	250.19	315.61	253.37	-0.316897
ath-miR156f-5p	20	4726	6774	4396	4116	4751	3695	300.73	327.97	318.13	249.9	260.02	250.19	315.61	253.37	-0.316897
ath-miR157a-5p	21	722	1232	600	1133	1046	766	45.94	59.65	43.42	68.79	57.25	51.87	49.67	59.3033	0.255738
ath-miR157b-5p	21	722	1232	600	1133	1046	766	45.94	59.65	43.42	68.79	57.25	51.87	49.67	59.3033	0.255738
ath-miR157c-5p	21	722	1232	600	1133	1046	766	45.94	59.65	43.42	68.79	57.25	51.87	49.67	59.3033	0.255738
ath-miR158a-3p	20	46546	65271	40085	56057	46131	50637	2961.84	3160.16	2900.89	3403.43	2524.78	3428.7	3007.63	3118.97	0.0524426
ath-miR158b	20	331	378	253	475	421	398	21.06	18.3	18.31	28.84	23.04	26.95	19.2233	26.2767	0.450924
ath-miR159a	21	25495	33058	21459	23147	24641	19354	1622.31	1600.54	1552.96	1405.34	1348.62	1310.49	1591.94	1354.82	-0.232685
ath-miR159b-3p	21	27328	32297	23430	19317	24530	20627	1738.95	1563.69	1695.59	1172.81	1342.54	1396.68	1666.08	1304.01	-0.3535
ath-miR159c	21	415	594	340	390	328	478	26.41	28.76	24.61	23.68	17.95	32.37	26.5933	24.6667	-0.108502
ath-miR160a-5p	21	718	828	424	468	457	309	45.69	40.09	30.68	28.41	25.01	20.92	38.82	24.78	-0.647624
ath-miR160b	21	718	828	424	468	457	309	45.69	40.09	30.68	28.41	25.01	20.92	38.82	24.78	-0.647624
ath-miR160c-5p	21	718	828	424	468	457	309	45.69	40.09	30.68	28.41	25.01	20.92	38.82	24.78	-0.647624
ath-miR161.1	21	15257	20110	12922	18109	19824	16970	970.84	973.65	935.15	1099.47	1084.98	1149.06	959.88	1111.17	0.211154
ath-miR161.2	21	180	242	127	230	208	152	11.45	11.72	9.19	13.96	11.38	10.29	10.7867	11.8767	0.138881
ath-miR162a-3p	21	7364	9721	6597	6031	6558	4994	468.59	470.65	477.42	366.16	358.92	338.15	472.22	354.41	-0.41404
ath-miR162b-3p	21	7364	9721	6597	6031	6558	4994	468.59	470.65	477.42	366.16	358.92	338.15	472.22	354.41	-0.41404
ath-miR163	24	3278	4804	3363	5588	5369	4921	208.59	232.59	243.38	339.27	293.85	333.21	228.187	322.11	0.497339
ath-miR164a	21	556	835	473	634	635	433	35.38	40.43	34.23	38.49	34.75	29.32	36.68	34.1867	-0.10156
ath-miR164b-5p	21	556	835	473	634	635	433	35.38	40.43	34.23	38.49	34.75	29.32	36.68	34.1867	-0.10156
ath-miR165a-3p	21	2881	3872	2354	2217	2354	1503	183.33	187.47	170.36	134.6	128.84	101.77	180.387	121.737	-0.567329
ath-miR165b	21	2881	3872	2354	2217	2354	1503	183.33	187.47	170.36	134.6	128.84	101.77	180.387	121.737	-0.567329
ath-miR166a-3p	21	18931	23532	15520	17435	17642	11876	1204.63	1139.32	1123.16	1058.54	965.56	804.14	1155.7	942.747	-0.293829
ath-miR166b-3p	21	18931	23532	15520	17435	17642	11876	1204.63	1139.32	1123.16	1058.54	965.56	804.14	1155.7	942.747	-0.293829
ath-miR166c	21	18931	23532	15520	17435	17642	11876	1204.63	1139.32	1123.16	1058.54	965.56	804.14	1155.7	942.747	-0.293829
ath-miR166d	21	18931	23532	15520	17435	17642	11876	1204.63	1139.32	1123.16	1058.54	965.56	804.14	1155.7	942.747	-0.293829
ath-miR166e-3p	21	18931	23532	15520	17435	17642	11876	1204.63	1139.32	1123.16	1058.54	965.56	804.14	1155.7	942.747	-0.293829
ath-miR166f	21	18931	23532	15520	17435	17642	11876	1204.63	1139.32	1123.16	1058.54	965.56	804.14	1155.7	942.747	-0.293829
ath-miR166g	21	18931	23532	15520	17435	17642	11876	1204.63	1139.32	1123.16	1058.54	965.56	804.14	1155.7	942.747	-0.293829
ath-miR167a-5p	21	4270	5801	3532	3118	3201	2394	271.71	280.86	255.61	189.31	175.19	162.1	269.393	175.533	-0.617969
ath-miR167b	21	4270	5801	3532	3118	3201	2394	271.71	280.86	255.61	189.31	175.19	162.1	269.393	175.533	-0.617969
ath-miR167d	22	397	468	302	163	162	124	25.26	22.66	21.86	9.9	8.87	8.4	23.26	9.05667	-1.3608
ath-miR168a-5p	21	455	739	463	581	584	441	28.95	35.78	33.51	35.27	31.96	29.86	32.7467	32.3633	-0.0169879
ath-miR168b-5p	21	455	739	463	581	584	441	28.95	35.78	33.51	35.27	31.96	29.86	32.7467	32.3633	-0.0169879
ath-miR170-5p	21	288	359	241	193	205	145	18.33	17.38	17.44	11.72	11.22	9.82	17.7167	10.92	-0.698134
ath-miR171a-3p	21	344	395	221	159	198	131	21.89	19.12	15.99	9.65	10.84	8.87	19	9.78667	-0.95711
ath-miR171b-3p	21	182	257	123	198	163	126	11.58	12.44	8.9	12.02	8.92	8.53	10.9733	9.82333	-0.159717
ath-miR171c-3p	21	182	257	123	198	163	126	11.58	12.44	8.9	12.02	8.92	8.53	10.9733	9.82333	-0.159717
ath-miR172a	21	464	671	431	553	430	240	29.53	32.49	31.19	33.57	23.53	16.25	31.07	24.45	-0.345688
ath-miR172b-3p	21	464	671	431	553	430	240	29.53	32.49	31.19	33.57	23.53	16.25	31.07	24.45	-0.345688
ath-miR173-5p	22	857	1126	633	1042	1125	682	54.53	54.52	45.81	63.26	61.57	46.18	51.62	57.0033	0.143116
ath-miR319a	21	2908	3421	2073	2750	3136	3343	185.04	165.63	150.02	166.96	171.64	226.36	166.897	188.32	0.174231
ath-miR319b	21	2908	3421	2073	2750	3136	3343	185.04	165.63	150.02	166.96	171.64	226.36	166.897	188.32	0.174231
ath-miR319c	21	515	534	377	254	332	374	32.77	25.85	27.28	15.42	18.17	25.32	28.6333	19.6367	-0.544146
ath-miR390a-5p	21	555	752	387	740	832	457	35.32	36.41	28.01	44.93	45.54	30.94	33.2467	40.47	0.283643
ath-miR390b-5p	21	555	752	387	740	832	457	35.32	36.41	28.01	44.93	45.54	30.94	33.2467	40.47	0.283643
ath-miR394a	20	685	992	497	494	569	440	43.59	48.03	35.97	29.99	31.14	29.79	42.53	30.3067	-0.488846
ath-miR394b-5p	20	685	992	497	494	569	440	43.59	48.03	35.97	29.99	31.14	29.79	42.53	30.3067	-0.488846
ath-miR395a	21	249	402	305	412	467	339	15.84	19.46	22.07	25.01	25.56	22.95	19.1233	24.5067	0.35784
ath-miR395b	21	337	489	294	365	325	296	21.44	23.68	21.28	22.16	17.79	20.04	22.1333	19.9967	-0.146461
ath-miR395c	21	337	489	294	365	325	296	21.44	23.68	21.28	22.16	17.79	20.04	22.1333	19.9967	-0.146461
ath-miR395d	21	249	402	305	412	467	339	15.84	19.46	22.07	25.01	25.56	22.95	19.1233	24.5067	0.35784
ath-miR395e	21	249	402	305	412	467	339	15.84	19.46	22.07	25.01	25.56	22.95	19.1233	24.5067	0.35784
ath-miR395f	21	337	489	294	365	325	296	21.44	23.68	21.28	22.16	17.79	20.04	22.1333	19.9967	-0.146461
ath-miR396a-5p	21	4092	4986	2525	2663	3284	2089	260.38	241.4	182.73	161.68	179.74	141.45	228.17	160.957	-0.503437
ath-miR396b-5p	21	7027	9943	6111	7525	7902	7418	447.15	481.4	442.24	456.87	432.48	502.28	456.93	463.877	0.0217681
ath-miR397b	21	232	255	171	354	383	220	14.76	12.35	12.38	21.49	20.96	14.9	13.1633	19.1167	0.538306
ath-miR398a-3p	21	1610	1611	1018	1625	1756	1943	102.45	78	73.67	98.66	96.11	131.56	84.7067	108.777	0.360822
ath-miR398b-3p	21	89507	88975	58945	62695	84132	56793	5695.55	4307.81	4265.76	3806.45	4604.59	3845.53	4756.37	4085.52	-0.219341
ath-miR398c-3p	21	89507	88975	58945	62695	84132	56793	5695.55	4307.81	4265.76	3806.45	4604.59	3845.53	4756.37	4085.52	-0.219341
ath-miR399b	21	2660	3367	2386	2406	2859	2091	169.26	163.02	172.67	146.08	156.47	141.58	168.317	148.043	-0.185159
ath-miR399c-3p	21	2660	3367	2386	2406	2859	2091	169.26	163.02	172.67	146.08	156.47	141.58	168.317	148.043	-0.185159
ath-miR403-3p	21	3563	5081	3031	3764	3808	3022	226.72	246	219.35	228.53	208.41	204.62	230.69	213.853	-0.109334
ath-miR408-3p	21	9254	12634	7757	14377	15322	8551	588.86	611.69	561.36	872.88	838.58	579	587.303	763.487	0.378497
ath-miR447a.2-3p	21	275	335	296	188	175	200	17.5	16.22	21.42	11.41	9.58	13.54	18.38	11.51	-0.675249
ath-miR5026	21	2362	3235	2105	2645	3062	3205	150.3	156.63	152.34	160.59	167.58	217.02	153.09	181.73	0.247417
ath-miR775	20	203	264	141	163	174	89	12.92	12.78	10.2	9.9	9.52	6.03	11.9667	8.48333	-0.496318
ath-miR822-5p	21	668	888	461	568	654	461	42.51	42.99	33.36	34.49	35.79	31.21	39.62	33.83	-0.227926
ath-miR824-5p	21	280	389	195	277	293	175	17.82	18.83	14.11	16.82	16.04	11.85	16.92	14.9033	-0.183095
ath-miR827	21	4859	5872	3329	2770	3084	3359	309.19	284.3	240.91	168.18	168.79	227.44	278.133	188.137	-0.563996
ath-miR843	21	95	102	64	324	324	330	6.05	4.94	4.63	19.67	17.73	22.34	5.20667	19.9133	1.9353
ath-miR845a	21	349	366	319	8954	15543	13203	22.21	17.72	23.09	543.63	850.68	893.99	21.0067	762.767	5.18232
ath-miR845b	22	9	3	14	317	512	373	0.57	0.15	1.01	19.25	28.02	25.26	0.576667	24.1767	5.38973
ath-miR846-3p	21	1489	1999	1532	2082	2375	2163	94.75	96.78	110.87	126.41	129.99	146.46	100.8	134.287	0.41382
ath-miR858a	21	536	657	479	482	654	487	34.11	31.81	34.66	29.26	35.79	32.98	33.5267	32.6767	-0.0370482
ath-miR858b	21	725	1040	630	703	768	649	46.13	50.35	45.59	42.68	42.03	43.94	47.3567	42.8833	-0.14315
